# Supplementary material for: Genomic temporal heterogeneity of circulating tumour DNA in unresectable metastatic colorectal cancer under first-line treatment
Source: PubMed Central journal article supplement — Gut. 2021 Sep 6;71(7):1340–9. doi: 10.1136/gutjnl-2021-324852 (PMC9185813; doi:10.1136/gutjnl-2021-324852), 2021-09-06
Supplement: gutjnl-2021-324852supp001.pdf [file gutjnl-2021-324852supp001.pdf]

## Supplementary Materials

- **Supplemental Methods**
- **Figure S1.** The association between baseline ctDNA levels and site of metastasis in the full cohort.
- **Figure S2.** Analysis of concordance in the RAS mutational status between paired ctDNA and tumor tissue according to metastatic sites
- **Figure S3.** The detailed dynamic changes in RAS status under first-line treatment before progressive disease among 145 patients
- **Figure S4.** The dynamics in ctDNA levels and the association with tumor load
- **Figure S5.** Dynamic changes in ctDNA levels correlated with efficacy evaluation before, during, and after first-line therapy in 20 patients
- **Figure S6.** Exploration of the potential mechanisms of acquired resistance to anti-EGFR-Abs in six patients who received cetuximab during first-line treatment
- **Table S1.** Clinical characteristics of 171 patients with mCRC at baseline
- **Table S2.** Mutational landscape in paired ctDNA and tumor tissue among 63 patients
- **Table S3.** 378 tumor-related genes contained in the NGS panel

## Supplemental Methods

### Circulating cell-free DNA (cfDNA) extraction from peripheral blood samples

Blood samples were collected with tubes containing EDTA and centrifuged within 2 hours of collection. Then, matched peripheral blood lymphocyte (PBL) debris and plasma were separately harvested and stored. Genomic DNA from matched PBLs was extracted using the RelaxGene Blood DNA System (Tiangen Biotech, Beijing, China), and circulating cfDNA was extracted from at least 2 mL of plasma using the QIAamp Circulating Nucleic Acid kit (Qiagen, Germany). Extracted DNA was then quantified with a Qubit 3.0 fluorometer (Thermo Fisher Scientific, MA, USA).

### Genomic DNA extraction from primary tumor tissue samples

Genomic DNA from formalin-fixed paraffin-embedded (FFPE) primary colorectal tumor samples that contained >30% tumor content, and patient-matched normal adjacent tissues (NATs) was extracted using the QIAamp DNA FFPE tissue kit (Qiagen, Germany). Extracted DNA was then quantified with a Qubit 3.0 fluorometer (Thermo Fisher Scientific, MA, USA).

### Library construction

Genomic DNA and cfDNA were sheared by dsDNA Fragmentase. Size selection of the DNA fragments (150-250 bp) was then performed using AMPure XP beads (Beckman Coulter, CA, USA). Genomic DNA fragments and cfDNA were used for library construction using the KAPA Library Preparation kit (Kapa Biosystems, MA, USA) according to the manufacturer's protocol. Agencourt AMPure XP beads (Beckman Coulter, CA, USA) were used for all clean-up steps. The purity and concentration of the DNA fragments were assessed with a Qubit 2.0 fluorometer (Thermo Fisher Scientific, MA, USA) and a Qubit dsDNA HS Assay kit (Agilent, CA, USA). End repair and 3'-end A-tailing were performed following DNA fragmentation.

### Targeted next-generation sequencing (NGS) of cfDNA

Targeted capture was performed using a custom set of biotinylated DNA probes (HapOncoCDx) that contained 378 cancer-related genes encompassing 1.15 Mb (HaploX Biotechnology, Shenzhen, China). An upgraded NGS panel consisting of 464 genes was employed since August 2018. We only took the genes included in the original panel for downstream analysis, with a total of 378 genes (**supplemental Table S3**). Hybridization of

the amplified sample libraries and the SeqCap EZ Library was conducted according to the manufacturer's protocol, and PCR was subsequently performed. The reactions were then pooled and purified with Agencourt AMPure XP beads (Beckman Coulter, CA, USA). The target-enriched libraries were then pooled and sequenced on an Illumina NovaSeq 6000 NGS platform (Illumina, USA).

### **Whole-exome sequencing (WES) of tissue tumor DNA**

Exonic regions of DNA were enriched with the WESPlus gene panel, which is an upgraded version of the standard WES panel (HaploX Biotechnology, Shenzhen, China), and 150-bp paired-end sequencing was performed on a NovaSeq 6000 system (Illumina, USA).

### **Background polishing of cfDNA mutation calling**

As to plasma variant calling, the dataset used for background polishing is the targeted-sequencing results of cell-free DNA (cfDNA) samples for 46 healthy donors who were recruited after a health evaluation. The relevant procedures of cfDNA extraction, library construction, targeted capture and sequencing, and mutation calling were described in the Method section. Mutations that were supported by  $\geq 3$  reads were included in the background polishing data sets and filtered out in the following analysis of cfDNA.

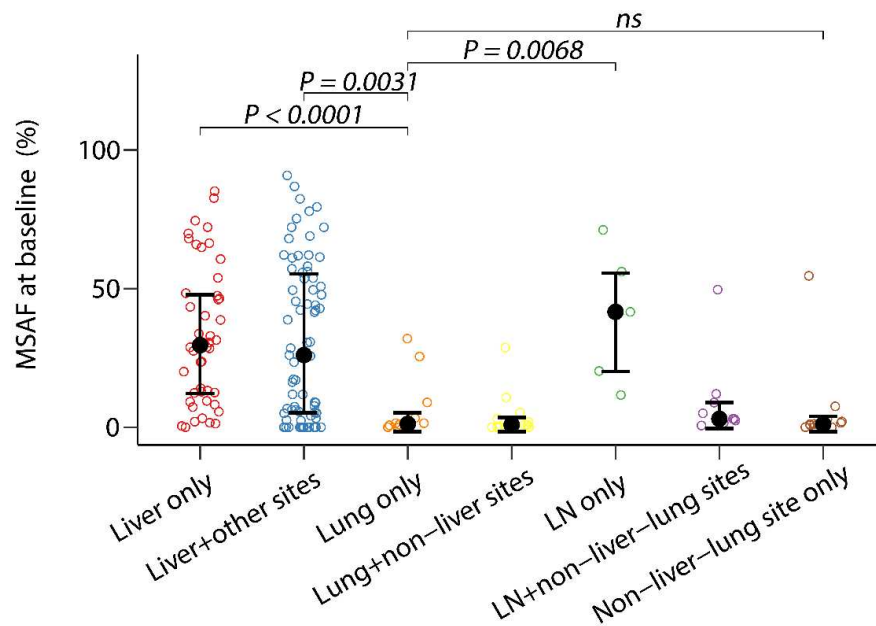

|                 | Liver only  | Liver + Other sites | Lung only | Lung + non-liver sites | LN only     | LN + non-liver-lung sites | Non-liver-lung sites only |
|-----------------|-------------|---------------------|-----------|------------------------|-------------|---------------------------|---------------------------|
| Patients (No.)  | 46          | 73                  | 12        | 13                     | 5           | 9                         | 13                        |
| MSAF median (%) | 29.6        | 26.0                | 1.2       | 0.9                    | 41.6        | 3.0                       | 1.1                       |
| IQR             | 12.4 - 48.1 | 5.0 - 55.8          | 0 - 4.7   | 0 - 3.1                | 20.3 - 56.1 | 2.4 - 8.9                 | 0.7 - 2.1                 |

**Fig S1. The association between baseline ctDNA levels and site of metastasis in the full cohort.** The black point depicts the median at the middle line, with the lower and upper lines at the first and third quartiles, respectively. Non-liver-lung metastatic sites include peritoneum, bone, ovary and uterus. MSAF, maximum variant allele frequencies; LN, lymph node; ns, not significant; IQR, Inter-Quartile Range.

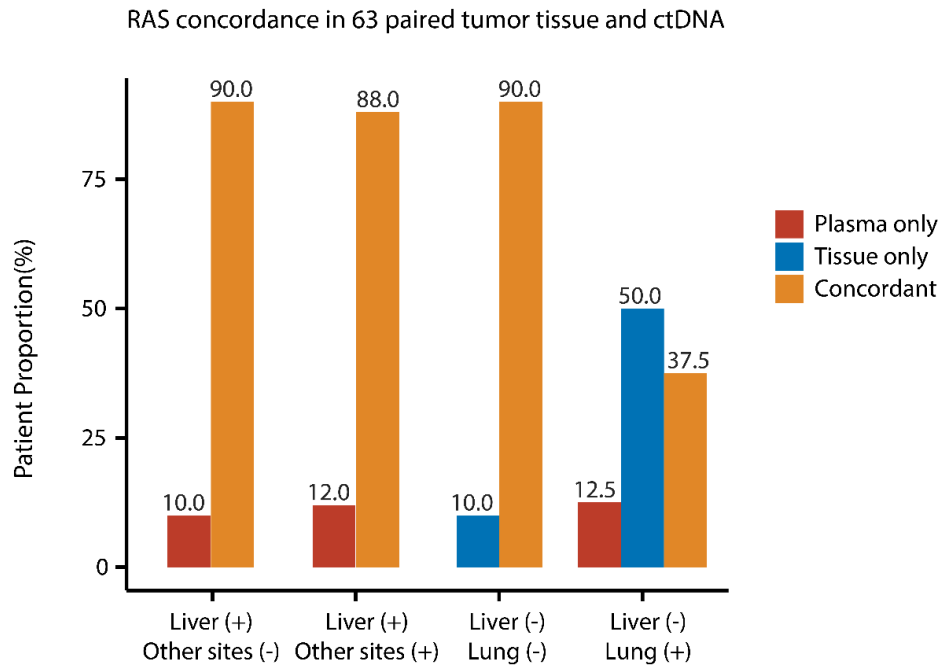

| Metastatic sites          | Plasma only | Tissue only | Concordant | n  |
|---------------------------|-------------|-------------|------------|----|
| Liver (+) Other sites (-) | 2           | 0           | 18         | 20 |
| Liver (+) Other sites (+) | 3           | 0           | 22         | 25 |
| Liver (-) Lung (-)        | 0           | 1           | 9          | 10 |
| Liver (-) Lung (+)        | 1           | 4           | 3          | 8  |
| n                         | 6           | 5           | 52         | 63 |

**Fig S2. Analysis of concordance in the RAS mutational status between paired ctDNA and tumor tissue according to metastatic sites.** Plasma only, RAS was only detected by ctDNA; Tissue only, RAS was only detected by tissue; LN, lymph node.

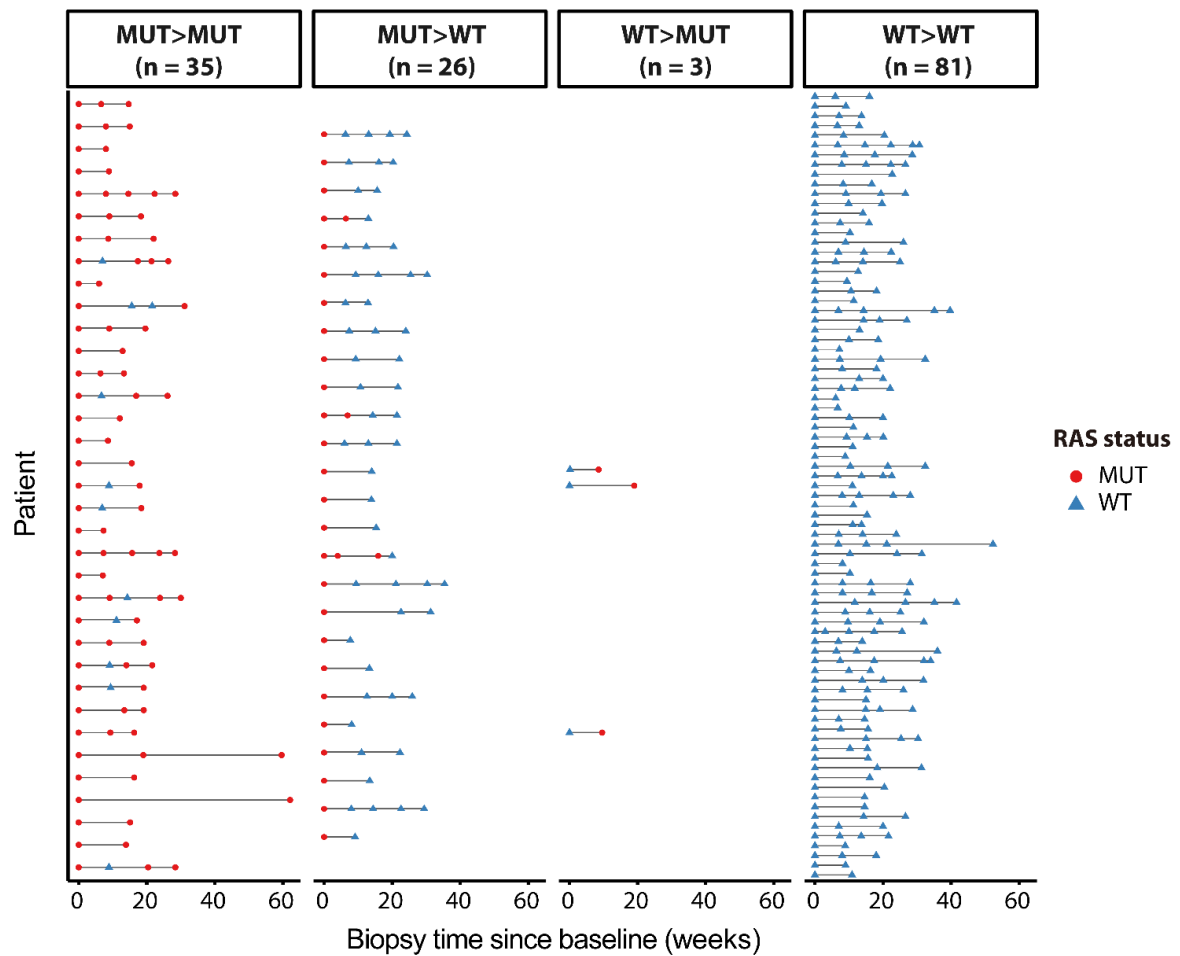

**Fig. S3. The detailed dynamic changes in RAS status under first-line treatment before progressive disease among 145 patients.** The red dot represents mutant-type, and blue triangle dot represents wild-type. MUT, mutant; WT, wild-type.

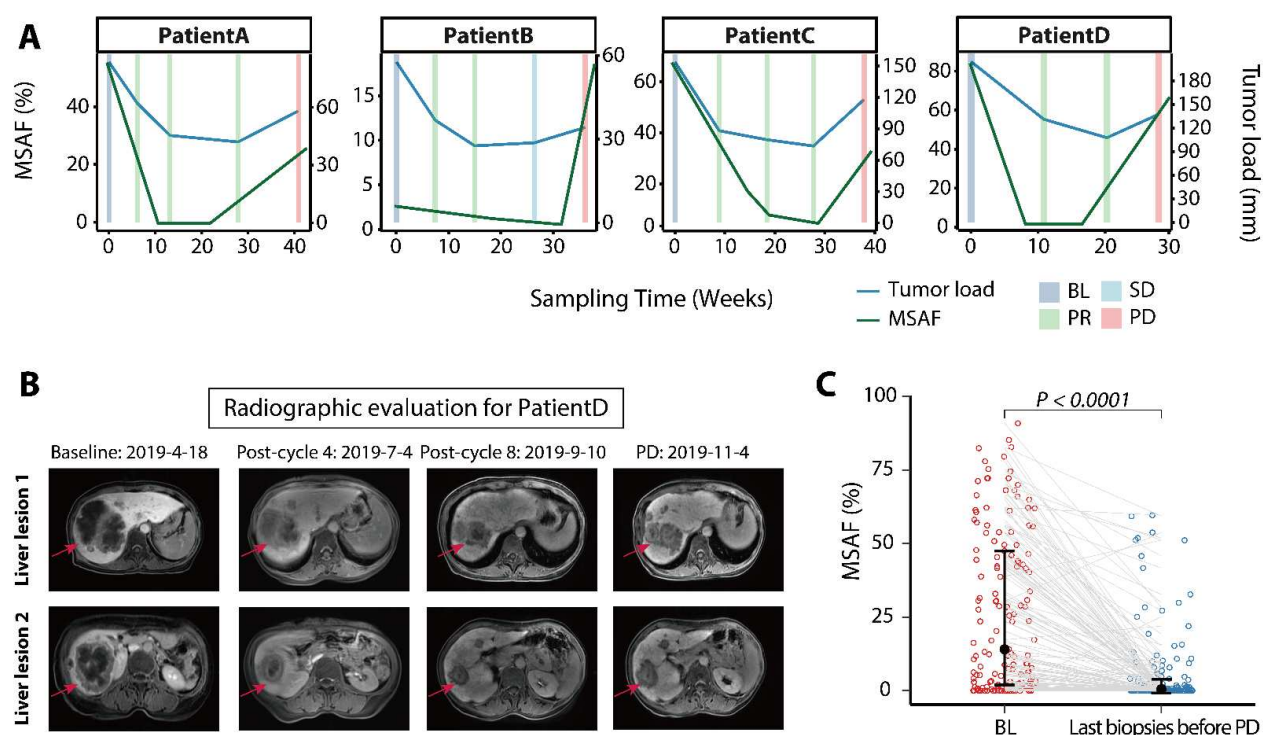

**Fig S4. The dynamics in ctDNA levels and the association with tumor load.**

(A) MSAF in ctDNA correlated with treatment response and tumor load in four patients;

(B) Radiographic evaluation in patient D used RECIST V1.1;

(C) Changes in ctDNA levels in 145 patients between baseline and last biopsy before progression. The black point depicts the median at the middle line, with the lower and upper lines at the first and third quartiles, respectively.

MSAF, maximum variant allele frequencies; BL, baseline; PR, partial response; SD, stable disease; PD, progressive disease.

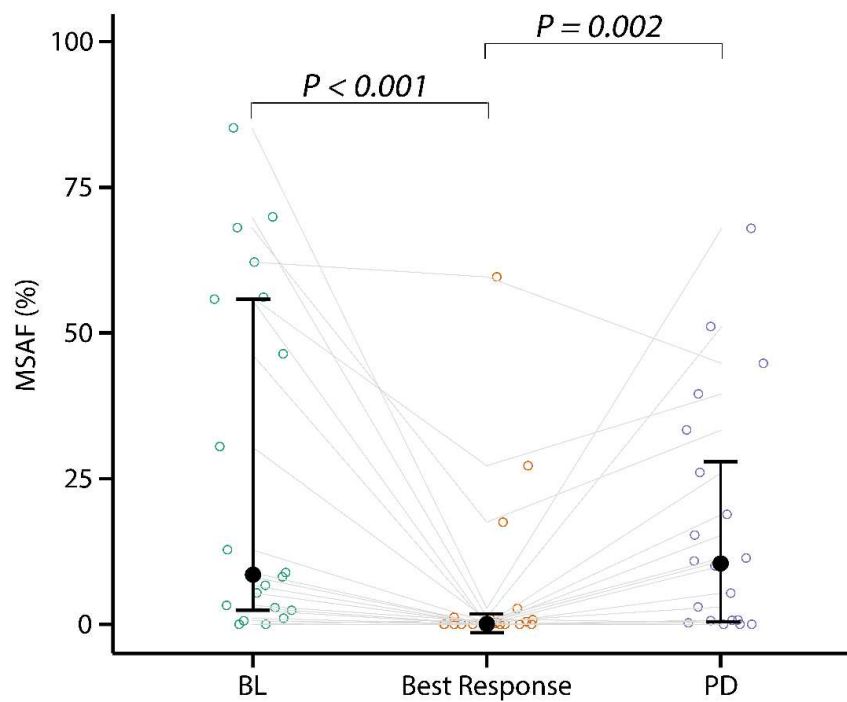

**Fig. S5. Dynamic changes in ctDNA levels correlated with efficacy evaluation before, during, and after first-line therapy in 20 patients.** The black point depicts the median at the middle line, with the lower and upper lines at the first and third quartiles, respectively. MSAF, maximum variant allele frequencies; BL, baseline; PD, progressive disease.



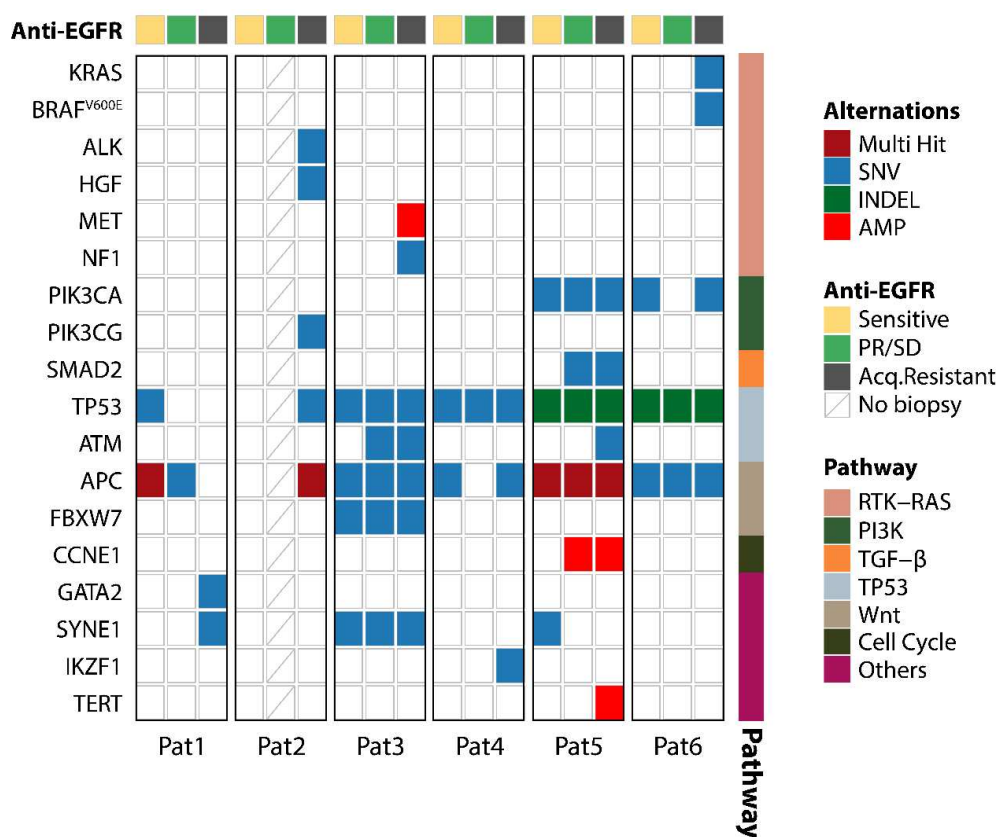

**Fig. S6. Exploration of the potential mechanisms of acquired resistance to anti-EGFR-Abs in six patients who received cetuximab during first-line treatment.** SNV, single nucleotide variants; INDEL, short insert and delete mutation; AMP, amplification; Acq.Resistant, acquired resistant. PR, partial response; SD, stable disease.

**Supplemental Table 1. Clinical characteristics of 171 patients with mCRC at baseline**

| <b>Characteristics</b>                           | <b>No. (%)</b> |
|--------------------------------------------------|----------------|
| <b>All Patients, No.</b>                         | 171            |
| <b>Age (median, range)</b>                       | 56 (27,78)     |
| <b>Gender</b>                                    |                |
| Female                                           | 61 (35.7)      |
| Male                                             | 110 (64.3)     |
| <b>Smoking History</b>                           |                |
| Yes                                              | 46 (26.9)      |
| No                                               | 125 (73.1)     |
| <b>Primary Tumor Location</b>                    |                |
| Left-sided                                       | 116 (67.8)     |
| Right-sided                                      | 55 (32.2)      |
| <b>Metastatic sites</b>                          |                |
| Liver alone                                      | 46 (26.9)      |
| Lung alone                                       | 12 (7.0)       |
| Distant lymph node alone                         | 5 (2.9)        |
| Other sites alone*                               | 13 (7.6)       |
| Multiple ( $\geq 2$ ) metastases                 | 95 (55.6)      |
| <b>RAS/BRAF<sup>V600E</sup> Status in Plasma</b> |                |
| RAS mutant                                       | 74 (43.3)      |
| BRAF <sup>V600E</sup> mutant                     | 11 (6.4)       |
| RAS & BRAF <sup>V600E</sup> wild                 | 86 (50.3)      |
| <b>First-line Regimen</b>                        |                |
| Chemotherapy plus bevacizumab                    | 94 (55.0)      |
| Chemotherapy only                                | 51 (29.8)      |
| Chemotherapy plus cetuximab                      | 25 (14.6)      |
| Immunotherapy only                               | 1 (0.6)        |

\*Other metastatic sites include peritoneum, bone, ovary and uterus.

**Supplemental Table 2. Mutational landscape in paired ctDNA and tumor tissue among 63 patients**

| Gene       | Mutated in ctDNA (No.) | Mutated in ctDNA (%) | Mutated in tissue (No.) | Mutated in tissue (%) | Co-mutated (No.) | Tissue only (No.) | ctDNA only (No.) | Co-wild (No.) | Overall Concordance /OPA (%) | Sensitivity /PPA (%) | Specificity /NPA (%) |
|------------|------------------------|----------------------|-------------------------|-----------------------|------------------|-------------------|------------------|---------------|------------------------------|----------------------|----------------------|
| TP53       | 43                     | 68.25                | 46                      | 73.02                 | 36               | 10                | 7                | 10            | 73.02                        | 78.26                | 58.82                |
| APC        | 40                     | 63.49                | 32                      | 50.79                 | 30               | 2                 | 10               | 21            | 80.95                        | 93.75                | 67.74                |
| KRAS       | 27                     | 42.86                | 26                      | 41.27                 | 21               | 5                 | 6                | 31            | 82.54                        | 80.77                | 83.78                |
| SMAD4      | 10                     | 15.87                | 15                      | 23.81                 | 7                | 8                 | 3                | 45            | 82.54                        | 46.67                | 93.75                |
| SYNE1      | 11                     | 17.46                | 12                      | 19.05                 | 5                | 7                 | 6                | 45            | 79.37                        | 41.67                | 88.24                |
| PIK3CA     | 9                      | 14.29                | 8                       | 12.7                  | 6                | 2                 | 3                | 52            | 92.06                        | 75.00                | 94.55                |
| BRAF V600E | 5                      | 7.94                 | 6                       | 9.5                   | 5                | 1                 | 0                | 57            | 98.41                        | 83.33                | 100.00               |
| FBXW7      | 4                      | 6.35                 | 5                       | 7.94                  | 4                | 1                 | 0                | 58            | 98.41                        | 80.00                | 100.00               |
| CARD11     | 4                      | 6.35                 | 4                       | 6.35                  | 4                | 0                 | 0                | 59            | 100.00                       | 100.00               | 100.00               |
| PIK3CG     | 4                      | 6.35                 | 4                       | 6.35                  | 3                | 1                 | 1                | 58            | 96.83                        | 75.00                | 98.31                |
| PTEN       | 4                      | 6.35                 | 4                       | 6.35                  | 3                | 1                 | 1                | 58            | 96.83                        | 75.00                | 98.31                |
| RET        | 4                      | 6.35                 | 4                       | 6.35                  | 3                | 1                 | 1                | 58            | 96.83                        | 75.00                | 98.31                |
| EP300      | 3                      | 4.76                 | 4                       | 6.35                  | 3                | 1                 | 0                | 59            | 98.41                        | 75.00                | 100.00               |
| NF1        | 3                      | 4.76                 | 4                       | 6.35                  | 2                | 2                 | 1                | 58            | 95.24                        | 50.00                | 98.31                |
| PIK3R1     | 3                      | 4.76                 | 4                       | 6.35                  | 3                | 1                 | 0                | 59            | 98.41                        | 75.00                | 100.00               |
| WRN        | 3                      | 4.76                 | 4                       | 6.35                  | 2                | 2                 | 1                | 58            | 95.24                        | 50.00                | 98.31                |
| ESR1       | 2                      | 3.17                 | 4                       | 6.35                  | 2                | 2                 | 0                | 59            | 96.83                        | 50.00                | 100.00               |
| ATM        | 6                      | 9.52                 | 3                       | 4.76                  | 3                | 0                 | 3                | 57            | 95.24                        | 100.00               | 95.00                |
| CREBBP     | 5                      | 7.94                 | 3                       | 4.76                  | 3                | 0                 | 2                | 58            | 96.83                        | 100.00               | 96.67                |
| KMT2C      | 5                      | 7.94                 | 3                       | 4.76                  | 1                | 2                 | 4                | 56            | 90.48                        | 33.33                | 93.33                |
| ALK        | 4                      | 6.35                 | 3                       | 4.76                  | 2                | 1                 | 2                | 58            | 95.24                        | 66.67                | 96.67                |
| KMT2D      | 4                      | 6.35                 | 3                       | 4.76                  | 0                | 3                 | 4                | 56            | 88.89                        | 0.00                 | 93.33                |
| AR         | 3                      | 4.76                 | 3                       | 4.76                  | 1                | 2                 | 2                | 58            | 93.65                        | 33.33                | 96.67                |
| CDH1       | 3                      | 4.76                 | 3                       | 4.76                  | 3                | 0                 | 0                | 60            | 100.00                       | 100.00               | 100.00               |
| MED12      | 3                      | 4.76                 | 3                       | 4.76                  | 1                | 2                 | 2                | 58            | 93.65                        | 33.33                | 96.67                |
| MTOR       | 3                      | 4.76                 | 3                       | 4.76                  | 3                | 0                 | 0                | 60            | 100.00                       | 100.00               | 100.00               |
| NRAS       | 3                      | 4.76                 | 3                       | 4.76                  | 3                | 0                 | 0                | 60            | 100.00                       | 100.00               | 100.00               |
| SETD2      | 3                      | 4.76                 | 3                       | 4.76                  | 3                | 0                 | 0                | 60            | 100.00                       | 100.00               | 100.00               |
| ABL1       | 2                      | 3.17                 | 3                       | 4.76                  | 2                | 1                 | 0                | 60            | 98.41                        | 66.67                | 100.00               |
| CADM2      | 2                      | 3.17                 | 3                       | 4.76                  | 2                | 1                 | 0                | 60            | 98.41                        | 66.67                | 100.00               |
| KDM6A      | 2                      | 3.17                 | 3                       | 4.76                  | 2                | 1                 | 0                | 60            | 98.41                        | 66.67                | 100.00               |
| SMARCA4    | 2                      | 3.17                 | 3                       | 4.76                  | 2                | 1                 | 0                | 60            | 98.41                        | 66.67                | 100.00               |
| TGFBR2     | 2                      | 3.17                 | 3                       | 4.76                  | 2                | 1                 | 0                | 60            | 98.41                        | 66.67                | 100.00               |
| FOXP2      | 1                      | 1.59                 | 3                       | 4.76                  | 1                | 2                 | 0                | 60            | 96.83                        | 33.33                | 100.00               |
| KDR        | 1                      | 1.59                 | 3                       | 4.76                  | 1                | 2                 | 0                | 60            | 96.83                        | 33.33                | 100.00               |
| MET        | 1                      | 1.59                 | 3                       | 4.76                  | 0                | 3                 | 1                | 59            | 93.65                        | 0.00                 | 98.33                |
| MLH3       | 1                      | 1.59                 | 3                       | 4.76                  | 1                | 2                 | 0                | 60            | 96.83                        | 33.33                | 100.00               |
| PTPRD      | 1                      | 1.59                 | 3                       | 4.76                  | 0                | 3                 | 1                | 59            | 93.65                        | 0.00                 | 98.33                |
| NRG1       | 0                      | 0                    | 3                       | 4.76                  | 0                | 3                 | 0                | 60            | 95.24                        | 0.00                 | 100.00               |
| CTNNB1     | 3                      | 4.76                 | 2                       | 3.17                  | 1                | 1                 | 2                | 59            | 95.24                        | 50.00                | 96.72                |
| FGF9       | 3                      | 4.76                 | 2                       | 3.17                  | 2                | 0                 | 1                | 60            | 98.41                        | 100.00               | 98.36                |
| MKI67      | 3                      | 4.76                 | 2                       | 3.17                  | 0                | 2                 | 3                | 58            | 92.06                        | 0.00                 | 95.08                |
| NTRK3      | 3                      | 4.76                 | 2                       | 3.17                  | 1                | 1                 | 2                | 59            | 95.24                        | 50.00                | 96.72                |
| PTPRT      | 3                      | 4.76                 | 2                       | 3.17                  | 1                | 1                 | 2                | 59            | 95.24                        | 50.00                | 96.72                |
| ARID1B     | 2                      | 3.17                 | 2                       | 3.17                  | 1                | 1                 | 1                | 60            | 96.83                        | 50.00                | 98.36                |
| AXIN2      | 2                      | 3.17                 | 2                       | 3.17                  | 0                | 2                 | 2                | 59            | 93.65                        | 0.00                 | 96.72                |
| BCL6       | 2                      | 3.17                 | 2                       | 3.17                  | 2                | 0                 | 0                | 61            | 100.00                       | 100.00               | 100.00               |
| BLM        | 2                      | 3.17                 | 2                       | 3.17                  | 2                | 0                 | 0                | 61            | 100.00                       | 100.00               | 100.00               |
| BRCA2      | 2                      | 3.17                 | 2                       | 3.17                  | 2                | 0                 | 0                | 61            | 100.00                       | 100.00               | 100.00               |
| CSF1R      | 2                      | 3.17                 | 2                       | 3.17                  | 2                | 0                 | 0                | 61            | 100.00                       | 100.00               | 100.00               |
| DDR2       | 2                      | 3.17                 | 2                       | 3.17                  | 2                | 0                 | 0                | 61            | 100.00                       | 100.00               | 100.00               |
| FGFR3      | 2                      | 3.17                 | 2                       | 3.17                  | 1                | 1                 | 1                | 60            | 96.83                        | 50.00                | 98.36                |
| LATS2      | 2                      | 3.17                 | 2                       | 3.17                  | 2                | 0                 | 0                | 61            | 100.00                       | 100.00               | 100.00               |
| MAP2K1     | 2                      | 3.17                 | 2                       | 3.17                  | 2                | 0                 | 0                | 61            | 100.00                       | 100.00               | 100.00               |
| MSH6       | 2                      | 3.17                 | 2                       | 3.17                  | 2                | 0                 | 0                | 61            | 100.00                       | 100.00               | 100.00               |
| NKX2-1     | 2                      | 3.17                 | 2                       | 3.17                  | 2                | 0                 | 0                | 61            | 100.00                       | 100.00               | 100.00               |
| NSD1       | 2                      | 3.17                 | 2                       | 3.17                  | 2                | 0                 | 0                | 61            | 100.00                       | 100.00               | 100.00               |
| PGR        | 2                      | 3.17                 | 2                       | 3.17                  | 2                | 0                 | 0                | 61            | 100.00                       | 100.00               | 100.00               |
| RAD21      | 2                      | 3.17                 | 2                       | 3.17                  | 1                | 1                 | 1                | 60            | 96.83                        | 50.00                | 98.36                |
| RECK       | 2                      | 3.17                 | 2                       | 3.17                  | 0                | 2                 | 2                | 59            | 93.65                        | 0.00                 | 96.72                |
| SMAD3      | 2                      | 3.17                 | 2                       | 3.17                  | 2                | 0                 | 0                | 61            | 100.00                       | 100.00               | 100.00               |

|          |   |      |   |      |   |   |   |    |        |        |        |
|----------|---|------|---|------|---|---|---|----|--------|--------|--------|
| BRD4     | 1 | 1.59 | 2 | 3.17 | 1 | 1 | 0 | 61 | 98.41  | 50.00  | 100.00 |
| BUB1     | 1 | 1.59 | 2 | 3.17 | 1 | 1 | 0 | 61 | 98.41  | 50.00  | 100.00 |
| CD274    | 1 | 1.59 | 2 | 3.17 | 0 | 2 | 1 | 60 | 95.24  | 0.00   | 98.36  |
| ERBB4    | 1 | 1.59 | 2 | 3.17 | 1 | 1 | 0 | 61 | 98.41  | 50.00  | 100.00 |
| FAT1     | 1 | 1.59 | 2 | 3.17 | 1 | 1 | 0 | 61 | 98.41  | 50.00  | 100.00 |
| FLT3     | 1 | 1.59 | 2 | 3.17 | 1 | 1 | 0 | 61 | 98.41  | 50.00  | 100.00 |
| HIF1A    | 1 | 1.59 | 2 | 3.17 | 1 | 1 | 0 | 61 | 98.41  | 50.00  | 100.00 |
| HOXB13   | 1 | 1.59 | 2 | 3.17 | 1 | 1 | 0 | 61 | 98.41  | 50.00  | 100.00 |
| HSP90AA1 | 1 | 1.59 | 2 | 3.17 | 1 | 1 | 0 | 61 | 98.41  | 50.00  | 100.00 |
| IFNLR1   | 1 | 1.59 | 2 | 3.17 | 1 | 1 | 0 | 61 | 98.41  | 50.00  | 100.00 |
| JAK3     | 1 | 1.59 | 2 | 3.17 | 1 | 1 | 0 | 61 | 98.41  | 50.00  | 100.00 |
| MITF     | 1 | 1.59 | 2 | 3.17 | 1 | 1 | 0 | 61 | 98.41  | 50.00  | 100.00 |
| NTRK1    | 1 | 1.59 | 2 | 3.17 | 0 | 2 | 1 | 60 | 95.24  | 0.00   | 98.36  |
| ROS1     | 1 | 1.59 | 2 | 3.17 | 1 | 1 | 0 | 61 | 98.41  | 50.00  | 100.00 |
| SETD7    | 1 | 1.59 | 2 | 3.17 | 1 | 1 | 0 | 61 | 98.41  | 50.00  | 100.00 |
| TOP1     | 1 | 1.59 | 2 | 3.17 | 1 | 1 | 0 | 61 | 98.41  | 50.00  | 100.00 |
| MST1R    | 0 | 0    | 2 | 3.17 | 0 | 2 | 0 | 61 | 96.83  | 0.00   | 100.00 |
| RNF43    | 0 | 0    | 2 | 3.17 | 0 | 2 | 0 | 61 | 96.83  | 0.00   | 100.00 |
| ARID2    | 5 | 7.94 | 1 | 1.59 | 1 | 0 | 4 | 58 | 93.65  | 100.00 | 93.55  |
| ARID1A   | 3 | 4.76 | 1 | 1.59 | 0 | 1 | 3 | 59 | 93.65  | 0.00   | 95.16  |
| CEBPA    | 3 | 4.76 | 1 | 1.59 | 1 | 0 | 2 | 60 | 96.83  | 100.00 | 96.77  |
| CHEK2    | 3 | 4.76 | 1 | 1.59 | 0 | 1 | 3 | 59 | 93.65  | 0.00   | 95.16  |
| DICER1   | 3 | 4.76 | 1 | 1.59 | 1 | 0 | 2 | 60 | 96.83  | 100.00 | 96.77  |
| MSH3     | 3 | 4.76 | 1 | 1.59 | 0 | 1 | 3 | 59 | 93.65  | 0.00   | 95.16  |
| NOTCH3   | 3 | 4.76 | 1 | 1.59 | 1 | 0 | 2 | 60 | 96.83  | 100.00 | 96.77  |
| PIK3R2   | 3 | 4.76 | 1 | 1.59 | 1 | 0 | 2 | 60 | 96.83  | 100.00 | 96.77  |
| POLE     | 3 | 4.76 | 1 | 1.59 | 1 | 0 | 2 | 60 | 96.83  | 100.00 | 96.77  |
| TET1     | 3 | 4.76 | 1 | 1.59 | 1 | 0 | 2 | 60 | 96.83  | 100.00 | 96.77  |
| ASXL1    | 2 | 3.17 | 1 | 1.59 | 1 | 0 | 1 | 61 | 98.41  | 100.00 | 98.39  |
| ATR      | 2 | 3.17 | 1 | 1.59 | 1 | 0 | 1 | 61 | 98.41  | 100.00 | 98.39  |
| B2M      | 2 | 3.17 | 1 | 1.59 | 1 | 0 | 1 | 61 | 98.41  | 100.00 | 98.39  |
| CBL      | 2 | 3.17 | 1 | 1.59 | 1 | 0 | 1 | 61 | 98.41  | 100.00 | 98.39  |
| FLT1     | 2 | 3.17 | 1 | 1.59 | 1 | 0 | 1 | 61 | 98.41  | 100.00 | 98.39  |
| FLT4     | 2 | 3.17 | 1 | 1.59 | 1 | 0 | 1 | 61 | 98.41  | 100.00 | 98.39  |
| GATA3    | 2 | 3.17 | 1 | 1.59 | 1 | 0 | 1 | 61 | 98.41  | 100.00 | 98.39  |
| GEN1     | 2 | 3.17 | 1 | 1.59 | 1 | 0 | 1 | 61 | 98.41  | 100.00 | 98.39  |
| INPP4B   | 2 | 3.17 | 1 | 1.59 | 1 | 0 | 1 | 61 | 98.41  | 100.00 | 98.39  |
| MAPKBP1  | 2 | 3.17 | 1 | 1.59 | 1 | 0 | 1 | 61 | 98.41  | 100.00 | 98.39  |
| NBN      | 2 | 3.17 | 1 | 1.59 | 1 | 0 | 1 | 61 | 98.41  | 100.00 | 98.39  |
| NOTCH2   | 2 | 3.17 | 1 | 1.59 | 1 | 0 | 1 | 61 | 98.41  | 100.00 | 98.39  |
| PARP1    | 2 | 3.17 | 1 | 1.59 | 1 | 0 | 1 | 61 | 98.41  | 100.00 | 98.39  |
| RECQL4   | 2 | 3.17 | 1 | 1.59 | 1 | 0 | 1 | 61 | 98.41  | 100.00 | 98.39  |
| RIF1     | 2 | 3.17 | 1 | 1.59 | 1 | 0 | 1 | 61 | 98.41  | 100.00 | 98.39  |
| RIT1     | 2 | 3.17 | 1 | 1.59 | 1 | 0 | 1 | 61 | 98.41  | 100.00 | 98.39  |
| SELL     | 2 | 3.17 | 1 | 1.59 | 1 | 0 | 1 | 61 | 98.41  | 100.00 | 98.39  |
| ADH1B    | 1 | 1.59 | 1 | 1.59 | 1 | 0 | 0 | 62 | 100.00 | 100.00 | 100.00 |
| AKT1     | 1 | 1.59 | 1 | 1.59 | 1 | 0 | 0 | 62 | 100.00 | 100.00 | 100.00 |
| AKT3     | 1 | 1.59 | 1 | 1.59 | 1 | 0 | 0 | 62 | 100.00 | 100.00 | 100.00 |
| ASPH     | 1 | 1.59 | 1 | 1.59 | 0 | 1 | 1 | 61 | 96.83  | 0.00   | 98.39  |
| BARD1    | 1 | 1.59 | 1 | 1.59 | 1 | 0 | 0 | 62 | 100.00 | 100.00 | 100.00 |
| BRCA1    | 1 | 1.59 | 1 | 1.59 | 1 | 0 | 0 | 62 | 100.00 | 100.00 | 100.00 |
| BTK      | 1 | 1.59 | 1 | 1.59 | 1 | 0 | 0 | 62 | 100.00 | 100.00 | 100.00 |
| CBLB     | 1 | 1.59 | 1 | 1.59 | 1 | 0 | 0 | 62 | 100.00 | 100.00 | 100.00 |
| CD79B    | 1 | 1.59 | 1 | 1.59 | 1 | 0 | 0 | 62 | 100.00 | 100.00 | 100.00 |
| CDK12    | 1 | 1.59 | 1 | 1.59 | 1 | 0 | 0 | 62 | 100.00 | 100.00 | 100.00 |
| CDKN1C   | 1 | 1.59 | 1 | 1.59 | 0 | 1 | 1 | 61 | 96.83  | 0.00   | 98.39  |
| CHEK1    | 1 | 1.59 | 1 | 1.59 | 1 | 0 | 0 | 62 | 100.00 | 100.00 | 100.00 |
| CIC      | 1 | 1.59 | 1 | 1.59 | 0 | 1 | 1 | 61 | 96.83  | 0.00   | 98.39  |
| CSF3R    | 1 | 1.59 | 1 | 1.59 | 1 | 0 | 0 | 62 | 100.00 | 100.00 | 100.00 |
| CTCF     | 1 | 1.59 | 1 | 1.59 | 1 | 0 | 0 | 62 | 100.00 | 100.00 | 100.00 |
| EGFR     | 1 | 1.59 | 1 | 1.59 | 0 | 1 | 1 | 61 | 96.83  | 0.00   | 98.39  |
| ELAC2    | 1 | 1.59 | 1 | 1.59 | 1 | 0 | 0 | 62 | 100.00 | 100.00 | 100.00 |
| EPHA3    | 1 | 1.59 | 1 | 1.59 | 1 | 0 | 0 | 62 | 100.00 | 100.00 | 100.00 |
| ERBB3    | 1 | 1.59 | 1 | 1.59 | 1 | 0 | 0 | 62 | 100.00 | 100.00 | 100.00 |
| ETV1     | 1 | 1.59 | 1 | 1.59 | 1 | 0 | 0 | 62 | 100.00 | 100.00 | 100.00 |
| ETV6     | 1 | 1.59 | 1 | 1.59 | 1 | 0 | 0 | 62 | 100.00 | 100.00 | 100.00 |
| FGF3     | 1 | 1.59 | 1 | 1.59 | 1 | 0 | 0 | 62 | 100.00 | 100.00 | 100.00 |
| FGF5     | 1 | 1.59 | 1 | 1.59 | 1 | 0 | 0 | 62 | 100.00 | 100.00 | 100.00 |
| FLCN     | 1 | 1.59 | 1 | 1.59 | 0 | 1 | 1 | 61 | 96.83  | 0.00   | 98.39  |
| GMEB1    | 1 | 1.59 | 1 | 1.59 | 0 | 1 | 1 | 61 | 96.83  | 0.00   | 98.39  |

|         |   |      |   |      |   |   |   |    |        |        |        |
|---------|---|------|---|------|---|---|---|----|--------|--------|--------|
| HNF1B   | 1 | 1.59 | 1 | 1.59 | 0 | 1 | 1 | 61 | 96.83  | 0.00   | 98.39  |
| HRAS    | 1 | 1.59 | 1 | 1.59 | 1 | 0 | 0 | 62 | 100.00 | 100.00 | 100.00 |
| IGF1R   | 1 | 1.59 | 1 | 1.59 | 0 | 1 | 1 | 61 | 96.83  | 0.00   | 98.39  |
| IKZF1   | 1 | 1.59 | 1 | 1.59 | 1 | 0 | 0 | 62 | 100.00 | 100.00 | 100.00 |
| IL7R    | 1 | 1.59 | 1 | 1.59 | 1 | 0 | 0 | 62 | 100.00 | 100.00 | 100.00 |
| KCNJ5   | 1 | 1.59 | 1 | 1.59 | 1 | 0 | 0 | 62 | 100.00 | 100.00 | 100.00 |
| KDM5C   | 1 | 1.59 | 1 | 1.59 | 1 | 0 | 0 | 62 | 100.00 | 100.00 | 100.00 |
| KIF1B   | 1 | 1.59 | 1 | 1.59 | 1 | 0 | 0 | 62 | 100.00 | 100.00 | 100.00 |
| KIT     | 1 | 1.59 | 1 | 1.59 | 1 | 0 | 0 | 62 | 100.00 | 100.00 | 100.00 |
| KMT2A   | 1 | 1.59 | 1 | 1.59 | 1 | 0 | 0 | 62 | 100.00 | 100.00 | 100.00 |
| KRT5    | 1 | 1.59 | 1 | 1.59 | 0 | 1 | 1 | 61 | 96.83  | 0.00   | 98.39  |
| LARP4   | 1 | 1.59 | 1 | 1.59 | 1 | 0 | 0 | 62 | 100.00 | 100.00 | 100.00 |
| MAP2K4  | 1 | 1.59 | 1 | 1.59 | 1 | 0 | 0 | 62 | 100.00 | 100.00 | 100.00 |
| MAPK1   | 1 | 1.59 | 1 | 1.59 | 1 | 0 | 0 | 62 | 100.00 | 100.00 | 100.00 |
| MDM2    | 1 | 1.59 | 1 | 1.59 | 1 | 0 | 0 | 62 | 100.00 | 100.00 | 100.00 |
| MDM4    | 1 | 1.59 | 1 | 1.59 | 1 | 0 | 0 | 62 | 100.00 | 100.00 | 100.00 |
| MEN1    | 1 | 1.59 | 1 | 1.59 | 1 | 0 | 0 | 62 | 100.00 | 100.00 | 100.00 |
| MTUS1   | 1 | 1.59 | 1 | 1.59 | 1 | 0 | 0 | 62 | 100.00 | 100.00 | 100.00 |
| MYC     | 1 | 1.59 | 1 | 1.59 | 1 | 0 | 0 | 62 | 100.00 | 100.00 | 100.00 |
| NOVA1   | 1 | 1.59 | 1 | 1.59 | 1 | 0 | 0 | 62 | 100.00 | 100.00 | 100.00 |
| NPM1    | 1 | 1.59 | 1 | 1.59 | 1 | 0 | 0 | 62 | 100.00 | 100.00 | 100.00 |
| PALB2   | 1 | 1.59 | 1 | 1.59 | 1 | 0 | 0 | 62 | 100.00 | 100.00 | 100.00 |
| PAX3    | 1 | 1.59 | 1 | 1.59 | 1 | 0 | 0 | 62 | 100.00 | 100.00 | 100.00 |
| PBRM1   | 1 | 1.59 | 1 | 1.59 | 1 | 0 | 0 | 62 | 100.00 | 100.00 | 100.00 |
| PDGFRA  | 1 | 1.59 | 1 | 1.59 | 0 | 1 | 1 | 61 | 96.83  | 0.00   | 98.39  |
| PDGFRB  | 1 | 1.59 | 1 | 1.59 | 1 | 0 | 0 | 62 | 100.00 | 100.00 | 100.00 |
| PIM1    | 1 | 1.59 | 1 | 1.59 | 1 | 0 | 0 | 62 | 100.00 | 100.00 | 100.00 |
| PRSS1   | 1 | 1.59 | 1 | 1.59 | 0 | 1 | 1 | 61 | 96.83  | 0.00   | 98.39  |
| RAD50   | 1 | 1.59 | 1 | 1.59 | 1 | 0 | 0 | 62 | 100.00 | 100.00 | 100.00 |
| RAD51B  | 1 | 1.59 | 1 | 1.59 | 1 | 0 | 0 | 62 | 100.00 | 100.00 | 100.00 |
| RAD51D  | 1 | 1.59 | 1 | 1.59 | 1 | 0 | 0 | 62 | 100.00 | 100.00 | 100.00 |
| RAF1    | 1 | 1.59 | 1 | 1.59 | 1 | 0 | 0 | 62 | 100.00 | 100.00 | 100.00 |
| RARA    | 1 | 1.59 | 1 | 1.59 | 1 | 0 | 0 | 62 | 100.00 | 100.00 | 100.00 |
| RB1     | 1 | 1.59 | 1 | 1.59 | 1 | 0 | 0 | 62 | 100.00 | 100.00 | 100.00 |
| RHEB    | 1 | 1.59 | 1 | 1.59 | 1 | 0 | 0 | 62 | 100.00 | 100.00 | 100.00 |
| RICTOR  | 1 | 1.59 | 1 | 1.59 | 1 | 0 | 0 | 62 | 100.00 | 100.00 | 100.00 |
| RNASEL  | 1 | 1.59 | 1 | 1.59 | 1 | 0 | 0 | 62 | 100.00 | 100.00 | 100.00 |
| SETBP1  | 1 | 1.59 | 1 | 1.59 | 1 | 0 | 0 | 62 | 100.00 | 100.00 | 100.00 |
| SLX4    | 1 | 1.59 | 1 | 1.59 | 1 | 0 | 0 | 62 | 100.00 | 100.00 | 100.00 |
| SMAD2   | 1 | 1.59 | 1 | 1.59 | 1 | 0 | 0 | 62 | 100.00 | 100.00 | 100.00 |
| SMO     | 1 | 1.59 | 1 | 1.59 | 1 | 0 | 0 | 62 | 100.00 | 100.00 | 100.00 |
| SRC     | 1 | 1.59 | 1 | 1.59 | 1 | 0 | 0 | 62 | 100.00 | 100.00 | 100.00 |
| STAG2   | 1 | 1.59 | 1 | 1.59 | 0 | 1 | 1 | 61 | 96.83  | 0.00   | 98.39  |
| STK11   | 1 | 1.59 | 1 | 1.59 | 1 | 0 | 0 | 62 | 100.00 | 100.00 | 100.00 |
| TET2    | 1 | 1.59 | 1 | 1.59 | 0 | 1 | 1 | 61 | 96.83  | 0.00   | 98.39  |
| VEGFA   | 1 | 1.59 | 1 | 1.59 | 1 | 0 | 0 | 62 | 100.00 | 100.00 | 100.00 |
| WT1     | 1 | 1.59 | 1 | 1.59 | 0 | 1 | 1 | 61 | 96.83  | 0.00   | 98.39  |
| XPO1    | 1 | 1.59 | 1 | 1.59 | 1 | 0 | 0 | 62 | 100.00 | 100.00 | 100.00 |
| ZBTB16  | 1 | 1.59 | 1 | 1.59 | 1 | 0 | 0 | 62 | 100.00 | 100.00 | 100.00 |
| ANXA5   | 0 | 0    | 1 | 1.59 | 0 | 1 | 0 | 62 | 98.41  | 0.00   | 100.00 |
| ATRX    | 0 | 0    | 1 | 1.59 | 0 | 1 | 0 | 62 | 98.41  | 0.00   | 100.00 |
| CAPN2   | 0 | 0    | 1 | 1.59 | 0 | 1 | 0 | 62 | 98.41  | 0.00   | 100.00 |
| CCND2   | 0 | 0    | 1 | 1.59 | 0 | 1 | 0 | 62 | 98.41  | 0.00   | 100.00 |
| CDKN1B  | 0 | 0    | 1 | 1.59 | 0 | 1 | 0 | 62 | 98.41  | 0.00   | 100.00 |
| ERCC5   | 0 | 0    | 1 | 1.59 | 0 | 1 | 0 | 62 | 98.41  | 0.00   | 100.00 |
| ERG     | 0 | 0    | 1 | 1.59 | 0 | 1 | 0 | 62 | 98.41  | 0.00   | 100.00 |
| FGF6    | 0 | 0    | 1 | 1.59 | 0 | 1 | 0 | 62 | 98.41  | 0.00   | 100.00 |
| FGFR1   | 0 | 0    | 1 | 1.59 | 0 | 1 | 0 | 62 | 98.41  | 0.00   | 100.00 |
| FOXP1   | 0 | 0    | 1 | 1.59 | 0 | 1 | 0 | 62 | 98.41  | 0.00   | 100.00 |
| GNAQ    | 0 | 0    | 1 | 1.59 | 0 | 1 | 0 | 62 | 98.41  | 0.00   | 100.00 |
| GNAS    | 0 | 0    | 1 | 1.59 | 0 | 1 | 0 | 62 | 98.41  | 0.00   | 100.00 |
| HSD17B3 | 0 | 0    | 1 | 1.59 | 0 | 1 | 0 | 62 | 98.41  | 0.00   | 100.00 |
| IDH2    | 0 | 0    | 1 | 1.59 | 0 | 1 | 0 | 62 | 98.41  | 0.00   | 100.00 |
| IGF2    | 0 | 0    | 1 | 1.59 | 0 | 1 | 0 | 62 | 98.41  | 0.00   | 100.00 |
| KLF4    | 0 | 0    | 1 | 1.59 | 0 | 1 | 0 | 62 | 98.41  | 0.00   | 100.00 |
| MAP3K1  | 0 | 0    | 1 | 1.59 | 0 | 1 | 0 | 62 | 98.41  | 0.00   | 100.00 |
| MAPK3   | 0 | 0    | 1 | 1.59 | 0 | 1 | 0 | 62 | 98.41  | 0.00   | 100.00 |
| MAX     | 0 | 0    | 1 | 1.59 | 0 | 1 | 0 | 62 | 98.41  | 0.00   | 100.00 |
| MEF2B   | 0 | 0    | 1 | 1.59 | 0 | 1 | 0 | 62 | 98.41  | 0.00   | 100.00 |
| MLH1    | 0 | 0    | 1 | 1.59 | 0 | 1 | 0 | 62 | 98.41  | 0.00   | 100.00 |

|          |   |      |   |      |   |   |   |    |       |        |        |
|----------|---|------|---|------|---|---|---|----|-------|--------|--------|
| MSH2     | 0 | 0    | 1 | 1.59 | 0 | 1 | 0 | 62 | 98.41 | 0.00   | 100.00 |
| MYCL     | 0 | 0    | 1 | 1.59 | 0 | 1 | 0 | 62 | 98.41 | 0.00   | 100.00 |
| MYCN     | 0 | 0    | 1 | 1.59 | 0 | 1 | 0 | 62 | 98.41 | 0.00   | 100.00 |
| PALLD    | 0 | 0    | 1 | 1.59 | 0 | 1 | 0 | 62 | 98.41 | 0.00   | 100.00 |
| PAX7     | 0 | 0    | 1 | 1.59 | 0 | 1 | 0 | 62 | 98.41 | 0.00   | 100.00 |
| PDPK1    | 0 | 0    | 1 | 1.59 | 0 | 1 | 0 | 62 | 98.41 | 0.00   | 100.00 |
| POLD1    | 0 | 0    | 1 | 1.59 | 0 | 1 | 0 | 62 | 98.41 | 0.00   | 100.00 |
| PPP2R1A  | 0 | 0    | 1 | 1.59 | 0 | 1 | 0 | 62 | 98.41 | 0.00   | 100.00 |
| PRKACB   | 0 | 0    | 1 | 1.59 | 0 | 1 | 0 | 62 | 98.41 | 0.00   | 100.00 |
| PTPN11   | 0 | 0    | 1 | 1.59 | 0 | 1 | 0 | 62 | 98.41 | 0.00   | 100.00 |
| RAD54L   | 0 | 0    | 1 | 1.59 | 0 | 1 | 0 | 62 | 98.41 | 0.00   | 100.00 |
| RECQL    | 0 | 0    | 1 | 1.59 | 0 | 1 | 0 | 62 | 98.41 | 0.00   | 100.00 |
| SF3B1    | 0 | 0    | 1 | 1.59 | 0 | 1 | 0 | 62 | 98.41 | 0.00   | 100.00 |
| STAT3    | 0 | 0    | 1 | 1.59 | 0 | 1 | 0 | 62 | 98.41 | 0.00   | 100.00 |
| TNFRSF19 | 0 | 0    | 1 | 1.59 | 0 | 1 | 0 | 62 | 98.41 | 0.00   | 100.00 |
| TRAF1    | 0 | 0    | 1 | 1.59 | 0 | 1 | 0 | 62 | 98.41 | 0.00   | 100.00 |
| YES1     | 0 | 0    | 1 | 1.59 | 0 | 1 | 0 | 62 | 98.41 | 0.00   | 100.00 |
| ZNF717   | 0 | 0    | 1 | 1.59 | 0 | 1 | 0 | 62 | 98.41 | 0.00   | 100.00 |
| DNMT3A   | 4 | 6.35 | 0 | 0    | 0 | 0 | 4 | 59 | 93.65 | 100.00 | 93.65  |
| CHD4     | 3 | 4.76 | 0 | 0    | 0 | 0 | 3 | 60 | 95.24 | 100.00 | 95.24  |
| AREG     | 2 | 3.17 | 0 | 0    | 0 | 0 | 2 | 61 | 96.83 | 100.00 | 96.83  |
| DDX51    | 2 | 3.17 | 0 | 0    | 0 | 0 | 2 | 61 | 96.83 | 100.00 | 96.83  |
| EPCAM    | 2 | 3.17 | 0 | 0    | 0 | 0 | 2 | 61 | 96.83 | 100.00 | 96.83  |
| ERBB2    | 2 | 3.17 | 0 | 0    | 0 | 0 | 2 | 61 | 96.83 | 100.00 | 96.83  |
| FANCA    | 2 | 3.17 | 0 | 0    | 0 | 0 | 2 | 61 | 96.83 | 100.00 | 96.83  |
| FGF10    | 2 | 3.17 | 0 | 0    | 0 | 0 | 2 | 61 | 96.83 | 100.00 | 96.83  |
| FGF7     | 2 | 3.17 | 0 | 0    | 0 | 0 | 2 | 61 | 96.83 | 100.00 | 96.83  |
| FGFR4    | 2 | 3.17 | 0 | 0    | 0 | 0 | 2 | 61 | 96.83 | 100.00 | 96.83  |
| HSD3B2   | 2 | 3.17 | 0 | 0    | 0 | 0 | 2 | 61 | 96.83 | 100.00 | 96.83  |
| JAK1     | 2 | 3.17 | 0 | 0    | 0 | 0 | 2 | 61 | 96.83 | 100.00 | 96.83  |
| JAK2     | 2 | 3.17 | 0 | 0    | 0 | 0 | 2 | 61 | 96.83 | 100.00 | 96.83  |
| PAX8     | 2 | 3.17 | 0 | 0    | 0 | 0 | 2 | 61 | 96.83 | 100.00 | 96.83  |
| SH2B3    | 2 | 3.17 | 0 | 0    | 0 | 0 | 2 | 61 | 96.83 | 100.00 | 96.83  |
| SUZ12    | 2 | 3.17 | 0 | 0    | 0 | 0 | 2 | 61 | 96.83 | 100.00 | 96.83  |
| TERT     | 2 | 3.17 | 0 | 0    | 0 | 0 | 2 | 61 | 96.83 | 100.00 | 96.83  |
| ALDH2    | 1 | 1.59 | 0 | 0    | 0 | 0 | 1 | 62 | 98.41 | 100.00 | 98.41  |
| BCOR     | 1 | 1.59 | 0 | 0    | 0 | 0 | 1 | 62 | 98.41 | 100.00 | 98.41  |
| CAMTA1   | 1 | 1.59 | 0 | 0    | 0 | 0 | 1 | 62 | 98.41 | 100.00 | 98.41  |
| CDC73    | 1 | 1.59 | 0 | 0    | 0 | 0 | 1 | 62 | 98.41 | 100.00 | 98.41  |
| CDK4     | 1 | 1.59 | 0 | 0    | 0 | 0 | 1 | 62 | 98.41 | 100.00 | 98.41  |
| CFD      | 1 | 1.59 | 0 | 0    | 0 | 0 | 1 | 62 | 98.41 | 100.00 | 98.41  |
| CXCR4    | 1 | 1.59 | 0 | 0    | 0 | 0 | 1 | 62 | 98.41 | 100.00 | 98.41  |
| EXT1     | 1 | 1.59 | 0 | 0    | 0 | 0 | 1 | 62 | 98.41 | 100.00 | 98.41  |
| EXT2     | 1 | 1.59 | 0 | 0    | 0 | 0 | 1 | 62 | 98.41 | 100.00 | 98.41  |
| FANCB    | 1 | 1.59 | 0 | 0    | 0 | 0 | 1 | 62 | 98.41 | 100.00 | 98.41  |
| FANCL    | 1 | 1.59 | 0 | 0    | 0 | 0 | 1 | 62 | 98.41 | 100.00 | 98.41  |
| FGF4     | 1 | 1.59 | 0 | 0    | 0 | 0 | 1 | 62 | 98.41 | 100.00 | 98.41  |
| FGFR2    | 1 | 1.59 | 0 | 0    | 0 | 0 | 1 | 62 | 98.41 | 100.00 | 98.41  |
| FOXK2    | 1 | 1.59 | 0 | 0    | 0 | 0 | 1 | 62 | 98.41 | 100.00 | 98.41  |
| FOXL2    | 1 | 1.59 | 0 | 0    | 0 | 0 | 1 | 62 | 98.41 | 100.00 | 98.41  |
| GAB2     | 1 | 1.59 | 0 | 0    | 0 | 0 | 1 | 62 | 98.41 | 100.00 | 98.41  |
| GATA1    | 1 | 1.59 | 0 | 0    | 0 | 0 | 1 | 62 | 98.41 | 100.00 | 98.41  |
| GEMIN6   | 1 | 1.59 | 0 | 0    | 0 | 0 | 1 | 62 | 98.41 | 100.00 | 98.41  |
| GLIPR1   | 1 | 1.59 | 0 | 0    | 0 | 0 | 1 | 62 | 98.41 | 100.00 | 98.41  |
| HFE2     | 1 | 1.59 | 0 | 0    | 0 | 0 | 1 | 62 | 98.41 | 100.00 | 98.41  |
| KRT15    | 1 | 1.59 | 0 | 0    | 0 | 0 | 1 | 62 | 98.41 | 100.00 | 98.41  |
| LBR      | 1 | 1.59 | 0 | 0    | 0 | 0 | 1 | 62 | 98.41 | 100.00 | 98.41  |
| LRIG3    | 1 | 1.59 | 0 | 0    | 0 | 0 | 1 | 62 | 98.41 | 100.00 | 98.41  |
| MPL      | 1 | 1.59 | 0 | 0    | 0 | 0 | 1 | 62 | 98.41 | 100.00 | 98.41  |
| MRE11A   | 1 | 1.59 | 0 | 0    | 0 | 0 | 1 | 62 | 98.41 | 100.00 | 98.41  |
| MUTYH    | 1 | 1.59 | 0 | 0    | 0 | 0 | 1 | 62 | 98.41 | 100.00 | 98.41  |
| MYOD1    | 1 | 1.59 | 0 | 0    | 0 | 0 | 1 | 62 | 98.41 | 100.00 | 98.41  |
| NF2      | 1 | 1.59 | 0 | 0    | 0 | 0 | 1 | 62 | 98.41 | 100.00 | 98.41  |
| NOTCH1   | 1 | 1.59 | 0 | 0    | 0 | 0 | 1 | 62 | 98.41 | 100.00 | 98.41  |
| PAK1     | 1 | 1.59 | 0 | 0    | 0 | 0 | 1 | 62 | 98.41 | 100.00 | 98.41  |
| PAX5     | 1 | 1.59 | 0 | 0    | 0 | 0 | 1 | 62 | 98.41 | 100.00 | 98.41  |
| PIK3CB   | 1 | 1.59 | 0 | 0    | 0 | 0 | 1 | 62 | 98.41 | 100.00 | 98.41  |
| PMS1     | 1 | 1.59 | 0 | 0    | 0 | 0 | 1 | 62 | 98.41 | 100.00 | 98.41  |
| PMS2     | 1 | 1.59 | 0 | 0    | 0 | 0 | 1 | 62 | 98.41 | 100.00 | 98.41  |
| PPP2R2A  | 1 | 1.59 | 0 | 0    | 0 | 0 | 1 | 62 | 98.41 | 100.00 | 98.41  |

|         |   |      |   |   |   |   |   |    |        |        |        |
|---------|---|------|---|---|---|---|---|----|--------|--------|--------|
| PTCH1   | 1 | 1.59 | 0 | 0 | 0 | 0 | 1 | 62 | 98.41  | 100.00 | 98.41  |
| PTN     | 1 | 1.59 | 0 | 0 | 0 | 0 | 1 | 62 | 98.41  | 100.00 | 98.41  |
| REL     | 1 | 1.59 | 0 | 0 | 0 | 0 | 1 | 62 | 98.41  | 100.00 | 98.41  |
| RHOA    | 1 | 1.59 | 0 | 0 | 0 | 0 | 1 | 62 | 98.41  | 100.00 | 98.41  |
| RILP    | 1 | 1.59 | 0 | 0 | 0 | 0 | 1 | 62 | 98.41  | 100.00 | 98.41  |
| RPS6KB1 | 1 | 1.59 | 0 | 0 | 0 | 0 | 1 | 62 | 98.41  | 100.00 | 98.41  |
| SDHC    | 1 | 1.59 | 0 | 0 | 0 | 0 | 1 | 62 | 98.41  | 100.00 | 98.41  |
| TSC2    | 1 | 1.59 | 0 | 0 | 0 | 0 | 1 | 62 | 98.41  | 100.00 | 98.41  |
| TSHR    | 1 | 1.59 | 0 | 0 | 0 | 0 | 1 | 62 | 98.41  | 100.00 | 98.41  |
| YAP1    | 1 | 1.59 | 0 | 0 | 0 | 0 | 1 | 62 | 98.41  | 100.00 | 98.41  |
| ACTL6A  | 0 | 0    | 0 | 0 | 0 | 0 | 0 | 63 | 100.00 | 100.00 | 100.00 |
| AKT2    | 0 | 0    | 0 | 0 | 0 | 0 | 0 | 63 | 100.00 | 100.00 | 100.00 |
| ARAF    | 0 | 0    | 0 | 0 | 0 | 0 | 0 | 63 | 100.00 | 100.00 | 100.00 |
| ASNS    | 0 | 0    | 0 | 0 | 0 | 0 | 0 | 63 | 100.00 | 100.00 | 100.00 |
| AURKA   | 0 | 0    | 0 | 0 | 0 | 0 | 0 | 63 | 100.00 | 100.00 | 100.00 |
| BAP1    | 0 | 0    | 0 | 0 | 0 | 0 | 0 | 63 | 100.00 | 100.00 | 100.00 |
| BCL2    | 0 | 0    | 0 | 0 | 0 | 0 | 0 | 63 | 100.00 | 100.00 | 100.00 |
| BCORL1  | 0 | 0    | 0 | 0 | 0 | 0 | 0 | 63 | 100.00 | 100.00 | 100.00 |
| BMPR1A  | 0 | 0    | 0 | 0 | 0 | 0 | 0 | 63 | 100.00 | 100.00 | 100.00 |
| BRD2    | 0 | 0    | 0 | 0 | 0 | 0 | 0 | 63 | 100.00 | 100.00 | 100.00 |
| BRIP1   | 0 | 0    | 0 | 0 | 0 | 0 | 0 | 63 | 100.00 | 100.00 | 100.00 |
| CALR    | 0 | 0    | 0 | 0 | 0 | 0 | 0 | 63 | 100.00 | 100.00 | 100.00 |
| CASP8   | 0 | 0    | 0 | 0 | 0 | 0 | 0 | 63 | 100.00 | 100.00 | 100.00 |
| CBFB    | 0 | 0    | 0 | 0 | 0 | 0 | 0 | 63 | 100.00 | 100.00 | 100.00 |
| CCL18   | 0 | 0    | 0 | 0 | 0 | 0 | 0 | 63 | 100.00 | 100.00 | 100.00 |
| CCND1   | 0 | 0    | 0 | 0 | 0 | 0 | 0 | 63 | 100.00 | 100.00 | 100.00 |
| CCND3   | 0 | 0    | 0 | 0 | 0 | 0 | 0 | 63 | 100.00 | 100.00 | 100.00 |
| CCNE1   | 0 | 0    | 0 | 0 | 0 | 0 | 0 | 63 | 100.00 | 100.00 | 100.00 |
| CD79A   | 0 | 0    | 0 | 0 | 0 | 0 | 0 | 63 | 100.00 | 100.00 | 100.00 |
| CDK6    | 0 | 0    | 0 | 0 | 0 | 0 | 0 | 63 | 100.00 | 100.00 | 100.00 |
| CDKN1A  | 0 | 0    | 0 | 0 | 0 | 0 | 0 | 63 | 100.00 | 100.00 | 100.00 |
| CDKN2A  | 0 | 0    | 0 | 0 | 0 | 0 | 0 | 63 | 100.00 | 100.00 | 100.00 |
| CDKN2B  | 0 | 0    | 0 | 0 | 0 | 0 | 0 | 63 | 100.00 | 100.00 | 100.00 |
| CDKN2C  | 0 | 0    | 0 | 0 | 0 | 0 | 0 | 63 | 100.00 | 100.00 | 100.00 |
| CRLF2   | 0 | 0    | 0 | 0 | 0 | 0 | 0 | 63 | 100.00 | 100.00 | 100.00 |
| DDX3X   | 0 | 0    | 0 | 0 | 0 | 0 | 0 | 63 | 100.00 | 100.00 | 100.00 |
| ERCC1   | 0 | 0    | 0 | 0 | 0 | 0 | 0 | 63 | 100.00 | 100.00 | 100.00 |
| ERCC2   | 0 | 0    | 0 | 0 | 0 | 0 | 0 | 63 | 100.00 | 100.00 | 100.00 |
| EREG    | 0 | 0    | 0 | 0 | 0 | 0 | 0 | 63 | 100.00 | 100.00 | 100.00 |
| ETV4    | 0 | 0    | 0 | 0 | 0 | 0 | 0 | 63 | 100.00 | 100.00 | 100.00 |
| EWSR1   | 0 | 0    | 0 | 0 | 0 | 0 | 0 | 63 | 100.00 | 100.00 | 100.00 |
| EZH2    | 0 | 0    | 0 | 0 | 0 | 0 | 0 | 63 | 100.00 | 100.00 | 100.00 |
| FAM175A | 0 | 0    | 0 | 0 | 0 | 0 | 0 | 63 | 100.00 | 100.00 | 100.00 |
| FANCC   | 0 | 0    | 0 | 0 | 0 | 0 | 0 | 63 | 100.00 | 100.00 | 100.00 |
| FANCG   | 0 | 0    | 0 | 0 | 0 | 0 | 0 | 63 | 100.00 | 100.00 | 100.00 |
| FANCI   | 0 | 0    | 0 | 0 | 0 | 0 | 0 | 63 | 100.00 | 100.00 | 100.00 |
| FGF1    | 0 | 0    | 0 | 0 | 0 | 0 | 0 | 63 | 100.00 | 100.00 | 100.00 |
| FGF2    | 0 | 0    | 0 | 0 | 0 | 0 | 0 | 63 | 100.00 | 100.00 | 100.00 |
| FGF23   | 0 | 0    | 0 | 0 | 0 | 0 | 0 | 63 | 100.00 | 100.00 | 100.00 |
| FGF8    | 0 | 0    | 0 | 0 | 0 | 0 | 0 | 63 | 100.00 | 100.00 | 100.00 |
| FH      | 0 | 0    | 0 | 0 | 0 | 0 | 0 | 63 | 100.00 | 100.00 | 100.00 |
| FOXA1   | 0 | 0    | 0 | 0 | 0 | 0 | 0 | 63 | 100.00 | 100.00 | 100.00 |
| FOXM1   | 0 | 0    | 0 | 0 | 0 | 0 | 0 | 63 | 100.00 | 100.00 | 100.00 |
| GATA2   | 0 | 0    | 0 | 0 | 0 | 0 | 0 | 63 | 100.00 | 100.00 | 100.00 |
| GK5     | 0 | 0    | 0 | 0 | 0 | 0 | 0 | 63 | 100.00 | 100.00 | 100.00 |
| GLRX    | 0 | 0    | 0 | 0 | 0 | 0 | 0 | 63 | 100.00 | 100.00 | 100.00 |
| GNAI1   | 0 | 0    | 0 | 0 | 0 | 0 | 0 | 63 | 100.00 | 100.00 | 100.00 |
| GREM1   | 0 | 0    | 0 | 0 | 0 | 0 | 0 | 63 | 100.00 | 100.00 | 100.00 |
| HGF     | 0 | 0    | 0 | 0 | 0 | 0 | 0 | 63 | 100.00 | 100.00 | 100.00 |
| HNF1A   | 0 | 0    | 0 | 0 | 0 | 0 | 0 | 63 | 100.00 | 100.00 | 100.00 |
| IDH1    | 0 | 0    | 0 | 0 | 0 | 0 | 0 | 63 | 100.00 | 100.00 | 100.00 |
| IFNL2   | 0 | 0    | 0 | 0 | 0 | 0 | 0 | 63 | 100.00 | 100.00 | 100.00 |
| JUN     | 0 | 0    | 0 | 0 | 0 | 0 | 0 | 63 | 100.00 | 100.00 | 100.00 |
| KEAP1   | 0 | 0    | 0 | 0 | 0 | 0 | 0 | 63 | 100.00 | 100.00 | 100.00 |
| KLLN    | 0 | 0    | 0 | 0 | 0 | 0 | 0 | 63 | 100.00 | 100.00 | 100.00 |
| KMT2B   | 0 | 0    | 0 | 0 | 0 | 0 | 0 | 63 | 100.00 | 100.00 | 100.00 |
| KRT14   | 0 | 0    | 0 | 0 | 0 | 0 | 0 | 63 | 100.00 | 100.00 | 100.00 |
| LATS1   | 0 | 0    | 0 | 0 | 0 | 0 | 0 | 63 | 100.00 | 100.00 | 100.00 |
| MAP2K2  | 0 | 0    | 0 | 0 | 0 | 0 | 0 | 63 | 100.00 | 100.00 | 100.00 |
| MCL1    | 0 | 0    | 0 | 0 | 0 | 0 | 0 | 63 | 100.00 | 100.00 | 100.00 |

|         |   |   |   |   |   |   |   |    |        |        |        |
|---------|---|---|---|---|---|---|---|----|--------|--------|--------|
| MYD88   | 0 | 0 | 0 | 0 | 0 | 0 | 0 | 63 | 100.00 | 100.00 | 100.00 |
| NFE2L2  | 0 | 0 | 0 | 0 | 0 | 0 | 0 | 63 | 100.00 | 100.00 | 100.00 |
| PIK3CD  | 0 | 0 | 0 | 0 | 0 | 0 | 0 | 63 | 100.00 | 100.00 | 100.00 |
| PLAUR   | 0 | 0 | 0 | 0 | 0 | 0 | 0 | 63 | 100.00 | 100.00 | 100.00 |
| PLIN2   | 0 | 0 | 0 | 0 | 0 | 0 | 0 | 63 | 100.00 | 100.00 | 100.00 |
| PIIB    | 0 | 0 | 0 | 0 | 0 | 0 | 0 | 63 | 100.00 | 100.00 | 100.00 |
| PRDM1   | 0 | 0 | 0 | 0 | 0 | 0 | 0 | 63 | 100.00 | 100.00 | 100.00 |
| PRKARIA | 0 | 0 | 0 | 0 | 0 | 0 | 0 | 63 | 100.00 | 100.00 | 100.00 |
| PRKCI   | 0 | 0 | 0 | 0 | 0 | 0 | 0 | 63 | 100.00 | 100.00 | 100.00 |
| PSME2   | 0 | 0 | 0 | 0 | 0 | 0 | 0 | 63 | 100.00 | 100.00 | 100.00 |
| RAC1    | 0 | 0 | 0 | 0 | 0 | 0 | 0 | 63 | 100.00 | 100.00 | 100.00 |
| RAD51   | 0 | 0 | 0 | 0 | 0 | 0 | 0 | 63 | 100.00 | 100.00 | 100.00 |
| RAD51C  | 0 | 0 | 0 | 0 | 0 | 0 | 0 | 63 | 100.00 | 100.00 | 100.00 |
| RBM10   | 0 | 0 | 0 | 0 | 0 | 0 | 0 | 63 | 100.00 | 100.00 | 100.00 |
| RUNX1   | 0 | 0 | 0 | 0 | 0 | 0 | 0 | 63 | 100.00 | 100.00 | 100.00 |
| SBDS    | 0 | 0 | 0 | 0 | 0 | 0 | 0 | 63 | 100.00 | 100.00 | 100.00 |
| SDHA    | 0 | 0 | 0 | 0 | 0 | 0 | 0 | 63 | 100.00 | 100.00 | 100.00 |
| SDHAF2  | 0 | 0 | 0 | 0 | 0 | 0 | 0 | 63 | 100.00 | 100.00 | 100.00 |
| SDHB    | 0 | 0 | 0 | 0 | 0 | 0 | 0 | 63 | 100.00 | 100.00 | 100.00 |
| SDHD    | 0 | 0 | 0 | 0 | 0 | 0 | 0 | 63 | 100.00 | 100.00 | 100.00 |
| SHOX    | 0 | 0 | 0 | 0 | 0 | 0 | 0 | 63 | 100.00 | 100.00 | 100.00 |
| SMARCB1 | 0 | 0 | 0 | 0 | 0 | 0 | 0 | 63 | 100.00 | 100.00 | 100.00 |
| SOCS6   | 0 | 0 | 0 | 0 | 0 | 0 | 0 | 63 | 100.00 | 100.00 | 100.00 |
| SOX2    | 0 | 0 | 0 | 0 | 0 | 0 | 0 | 63 | 100.00 | 100.00 | 100.00 |
| SPINK1  | 0 | 0 | 0 | 0 | 0 | 0 | 0 | 63 | 100.00 | 100.00 | 100.00 |
| SPOP    | 0 | 0 | 0 | 0 | 0 | 0 | 0 | 63 | 100.00 | 100.00 | 100.00 |
| SRD5A2  | 0 | 0 | 0 | 0 | 0 | 0 | 0 | 63 | 100.00 | 100.00 | 100.00 |
| SRSF2   | 0 | 0 | 0 | 0 | 0 | 0 | 0 | 63 | 100.00 | 100.00 | 100.00 |
| SYK     | 0 | 0 | 0 | 0 | 0 | 0 | 0 | 63 | 100.00 | 100.00 | 100.00 |
| TMEM127 | 0 | 0 | 0 | 0 | 0 | 0 | 0 | 63 | 100.00 | 100.00 | 100.00 |
| TNFSF8  | 0 | 0 | 0 | 0 | 0 | 0 | 0 | 63 | 100.00 | 100.00 | 100.00 |
| TSC1    | 0 | 0 | 0 | 0 | 0 | 0 | 0 | 63 | 100.00 | 100.00 | 100.00 |
| U2AF1   | 0 | 0 | 0 | 0 | 0 | 0 | 0 | 63 | 100.00 | 100.00 | 100.00 |
| UGT1A1  | 0 | 0 | 0 | 0 | 0 | 0 | 0 | 63 | 100.00 | 100.00 | 100.00 |
| VHL     | 0 | 0 | 0 | 0 | 0 | 0 | 0 | 63 | 100.00 | 100.00 | 100.00 |
| WAS     | 0 | 0 | 0 | 0 | 0 | 0 | 0 | 63 | 100.00 | 100.00 | 100.00 |
| ZNF367  | 0 | 0 | 0 | 0 | 0 | 0 | 0 | 63 | 100.00 | 100.00 | 100.00 |

OPA, overall percent agreement; PPA, positive percent agreement; NPA, negative percent agreement.



**Supplemental Table 3. 378 tumor-related genes contained in the NGS panel.**

|        |        |         |        |          |         |        |         |         |          |
|--------|--------|---------|--------|----------|---------|--------|---------|---------|----------|
| ABL1   | BTK    | CSF3R   | FGF1   | GREM1    | KRT15   | MYOD1  | PMS2    | RIF1    | SYK      |
| ACTL6A | BUB1   | CTCF    | FGF10  | HFE2     | KRT5    | NBN    | POLD1   | RILP    | SYNE1    |
| ADH1B  | CADM2  | CTNNB1  | FGF2   | HGF      | LARP4   | NF1    | POLE    | RIT1    | TERT     |
| AKT1   | CALR   | CXCR4   | FGF23  | HIF1A    | LATS1   | NF2    | PPIB    | RNASEL  | TET1     |
| AKT2   | CAMTA1 | DDR2    | FGF3   | HNF1A    | LATS2   | NFE2L2 | PPP2R1A | RNF43   | TET2     |
| AKT3   | CAPN2  | DDX3X   | FGF4   | HNF1B    | LBR     | NKX2-1 | PPP2R2A | ROS1    | TGFBR2   |
| ALDH2  | CARD11 | DDX51   | FGF5   | HOXB13   | LRIG3   | NOTCH1 | PRDM1   | RPS6KB1 | TMEM127  |
| ALK    | CASP8  | DICER1  | FGF6   | HRAS     | MAP2K1  | NOTCH2 | PRKACB  | RUNX1   | TNFRSF19 |
| ANXA5  | CBFB   | DNMT3A  | FGF7   | HSD17B3  | MAP2K2  | NOTCH3 | PRKAR1A | SBDS    | TNFSF8   |
| APC    | CBL    | EGFR    | FGF8   | HSD3B2   | MAP2K4  | NOVA1  | PRKCI   | SDHA    | TOP1     |
| AR     | CBLB   | ELAC2   | FGF9   | HSP90AA1 | MAP3K1  | NPM1   | PRSS1   | SDHAF2  | TP53     |
| ARAF   | CCL18  | EP300   | FGFR1  | IDH1     | MAPK1   | NRAS   | PSME2   | SDHB    | TRAF1    |
| AREG   | CCND1  | EPCAM   | FGFR2  | IDH2     | MAPK3   | NRG1   | PTCH1   | SDHC    | TSC1     |
| ARID1A | CCND2  | EPHA3   | FGFR3  | IFNL2    | MAPKBP1 | NSD1   | PTEN    | SDHD    | TSC2     |
| ARID1B | CCND3  | ERBB2   | FGFR4  | IFNLR1   | MAX     | NTRK1  | PTN     | SELL    | TSHR     |
| ARID2  | CCNE1  | ERBB3   | FH     | IGF1R    | MCL1    | NTRK3  | PTPN11  | SETBP1  | U2AF1    |
| ASNS   | CD274  | ERBB4   | FLCN   | IGF2     | MDM2    | PAK1   | PTPRD   | SETD2   | UGT1A1   |
| ASPH   | CD79A  | ERCC1   | FLT1   | IKZF1    | MDM4    | PALB2  | PTPRT   | SETD7   | VEGFA    |
| ASXL1  | CD79B  | ERCC2   | FLT3   | IL7R     | MED12   | PALLD  | RAC1    | SF3B1   | VHL      |
| ATM    | CDC73  | ERCC5   | FLT4   | INPP4B   | MEF2B   | PARP1  | RAD21   | SH2B3   | WAS      |
| ATR    | CDH1   | EREG    | FOXA1  | JAK1     | MEN1    | PAX3   | RAD50   | SHOX    | WRN      |
| ATRX   | CDK12  | ERG     | FO XK2 | JAK2     | MET     | PAX5   | RAD51   | SLX4    | WT1      |
| AURKA  | CDK4   | ESR1    | FOXL2  | JAK3     | MITF    | PAX7   | RAD51B  | SMAD2   | XPO1     |
| AXIN2  | CDK6   | ETV1    | FOXM1  | JUN      | MKI67   | PAX8   | RAD51C  | SMAD3   | YAP1     |
| B2M    | CDKN1A | ETV4    | FOXP1  | KCNJ5    | MLH1    | PBRM1  | RAD51D  | SMAD4   | YES1     |
| BAP1   | CDKN1B | ETV6    | FOXP2  | KDM5C    | MLH3    | PDGFRA | RAD54L  | SMARCA4 | ZBTB16   |
| BARD1  | CDKN1C | EWSR1   | GAB2   | KDM6A    | MPL     | PDGFRB | RAF1    | SMARCB1 | ZNF367   |
| BCL2   | CDKN2A | EXT1    | GATA1  | KDR      | MRE11A  | PDPK1  | RARA    | SMO     | ZNF717   |
| BCL6   | CDKN2B | EXT2    | GATA2  | KEAP1    | MSH2    | PGR    | RB1     | SOCS6   |          |
| BCOR   | CDKN2C | EZH2    | GATA3  | KIF1B    | MSH3    | PIK3CA | RBM10   | SOX2    |          |
| BCORL1 | CEBPA  | FAM175A | GEMIN6 | KIT      | MSH6    | PIK3CB | RECK    | SPINK1  |          |
| BLM    | CFD    | FANCA   | GEN1   | KLF4     | MST1R   | PIK3CD | RECQL   | SPOP    |          |
| BMPR1A | CHD4   | FANCB   | GK5    | KLLN     | MTOR    | PIK3CG | RECQL4  | SRC     |          |
| BRAF   | CHEK1  | FANCC   | GLIPR1 | KMT2A    | MTUS1   | PIK3R1 | REL     | SRD5A2  |          |
| BRCA1  | CHEK2  | FANCG   | GLRX   | KMT2B    | MUTYH   | PIK3R2 | RET     | SRSF2   |          |
| BRCA2  | CIC    | FANCI   | GMEB1  | KMT2C    | MYC     | PIM1   | RHEB    | STAG2   |          |
| BRD2   | CREBBP | FANCL   | GNA11  | KMT2D    | MYCL    | PLAUR  | RHOA    | STAT3   |          |
| BRD4   | CRLF2  | FAT1    | GNAQ   | KRAS     | MYCN    | PLIN2  | RICTOR  | STK11   |          |
| BRIP1  | CSF1R  | FBXW7   | GNAS   | KRT14    | MYD88   | PMS1   | RIF1    | SUZ12   |          |
